# Supplementary material
Source: MDPI journal article supplement (https://www.mdpi.com/2079-9276/11/12/111)
Supplement: s1 [file s1]

# Supplementary materials

## Forecasting Monthly River Flows in Ukraine under Different Climatic Conditions

Renata Graf <sup>1\*</sup> and Viktor Vyshnevskiy <sup>2</sup>

<sup>1</sup> Department of Hydrology and Water Management, Institute of Physical Geography and Environmental Planning, Adam Mickiewicz University, Bogumiła Krygowskiego 10 Street, 61-680 Poznań, Poland

<sup>2</sup> Faculty of International Relations, National Aviation University, Liubomyra Huzara Avenue 1, 03058 Kyiv, Ukraine

\* Correspondence: renata.graf@amu.edu.pl; Tel.: +48-61-829-6259

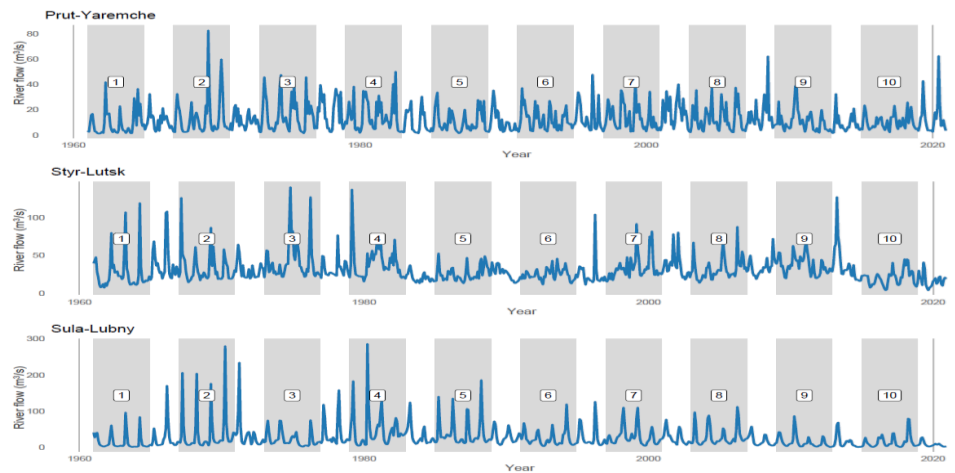

**Figure S1.** Custom validation subsets (grey areas) with skipped data (white areas) for river flow.

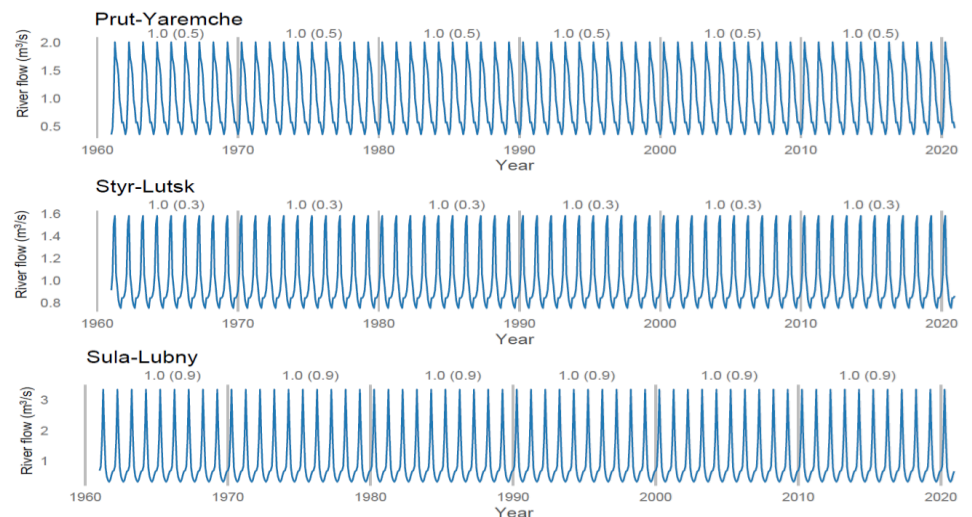

**Figure S2.** Seasonal flow values grouped by rivers (1961-2020).

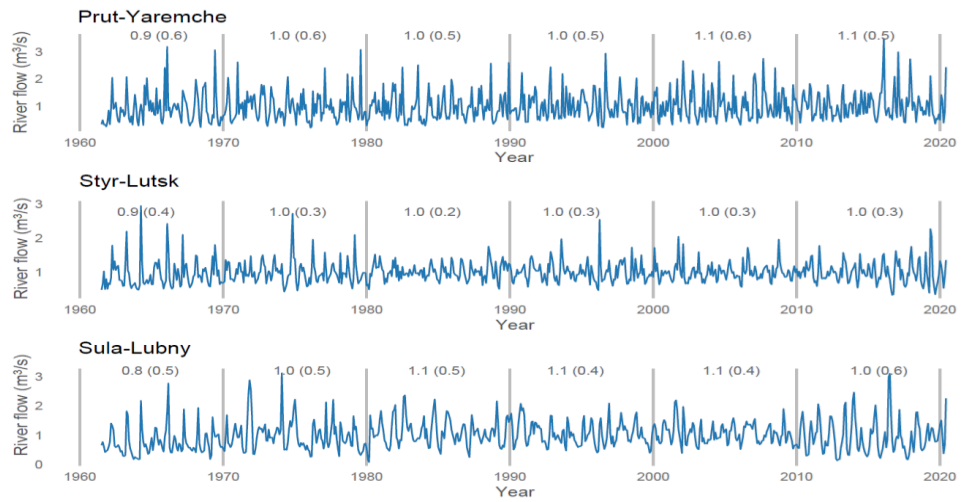

**Figure S3.** Random flow values grouped by rivers (1961-2020).

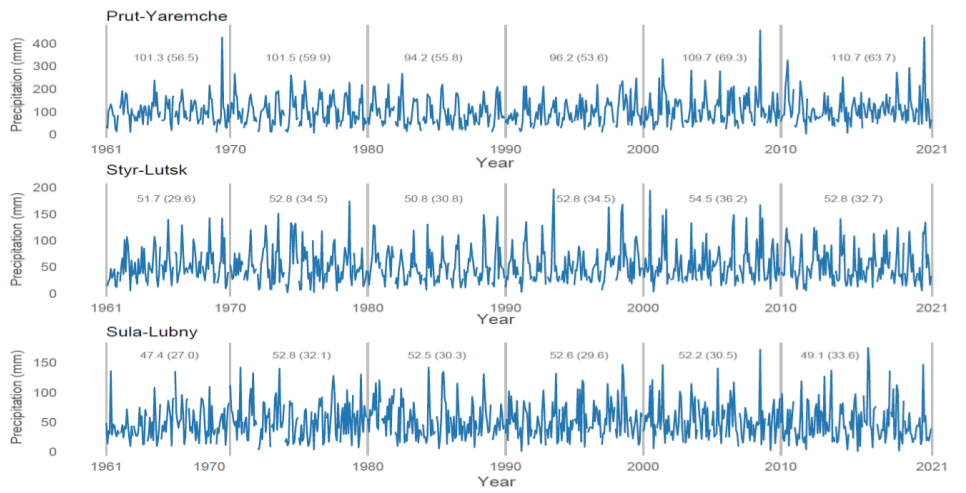

**Figure S4.** Precipitation time series distribution grouped by rivers' catchment areas (1961-2020). Note: Figure descriptions refer to non-parametric measures - mean (standard deviation).

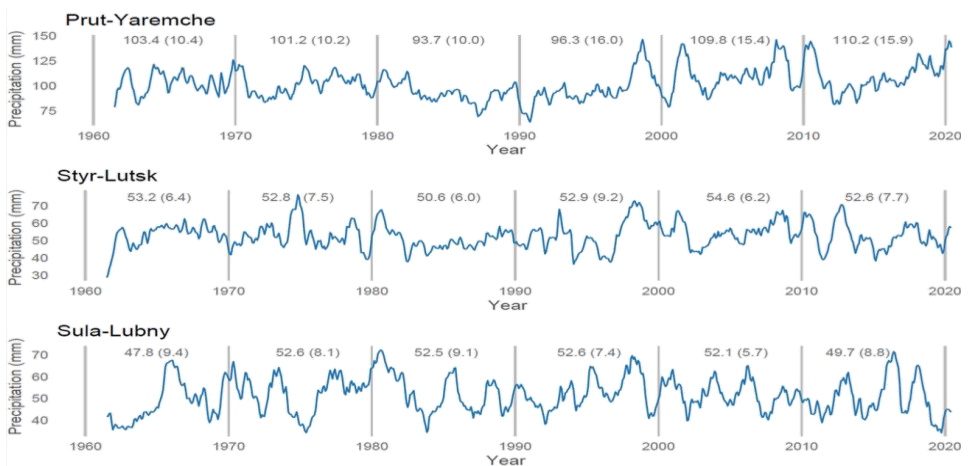

**Figure S5.** Precipitation trend values grouped by rivers (1961-2020).

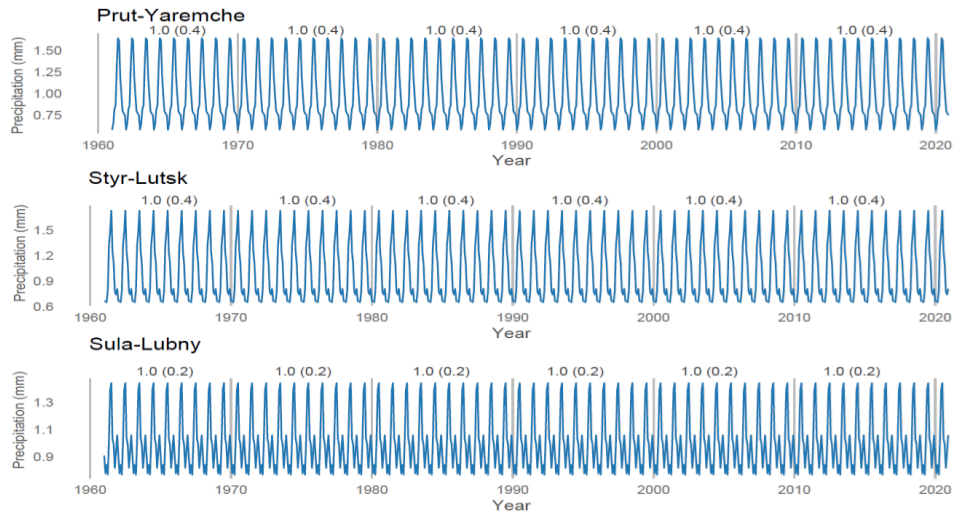

**Figure S6.** Precipitation seasonal values grouped by rivers (1961-2020).

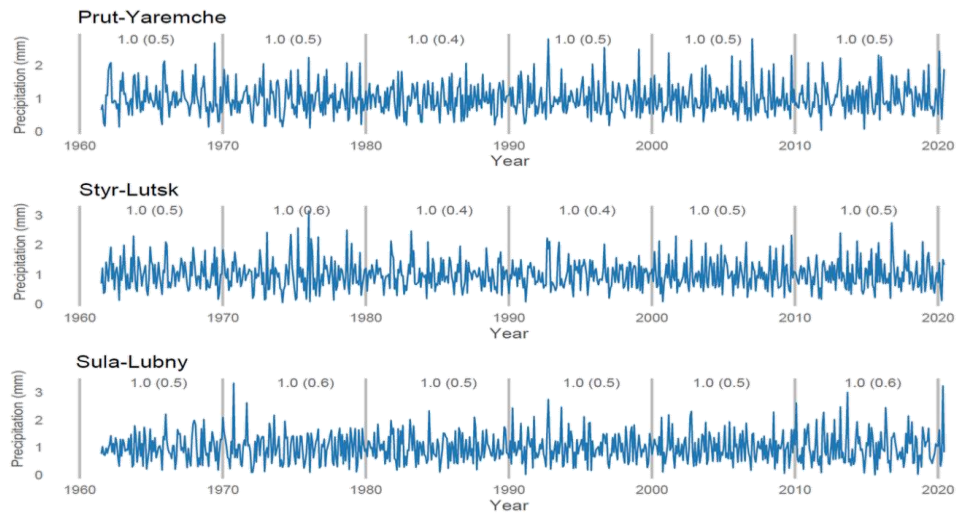

**Figure S7.** Precipitation random values grouped by rivers (1961-2020).

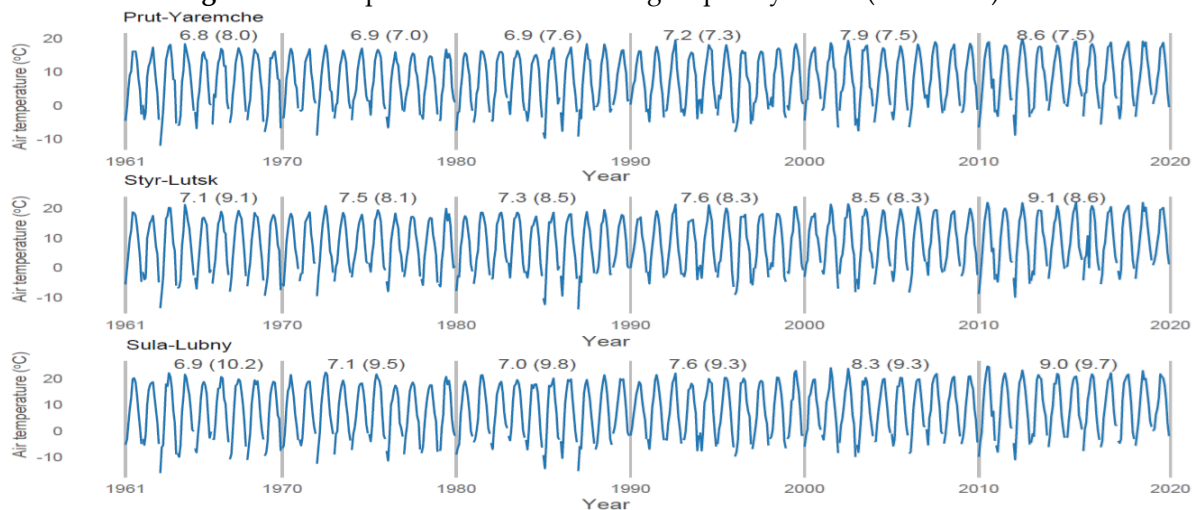

**Figure S8.** Air temperature time series distribution grouped by rivers' catchment areas (1961-2020). Note: Figure descriptions refer to non-parametric measures - mean (standard deviation).

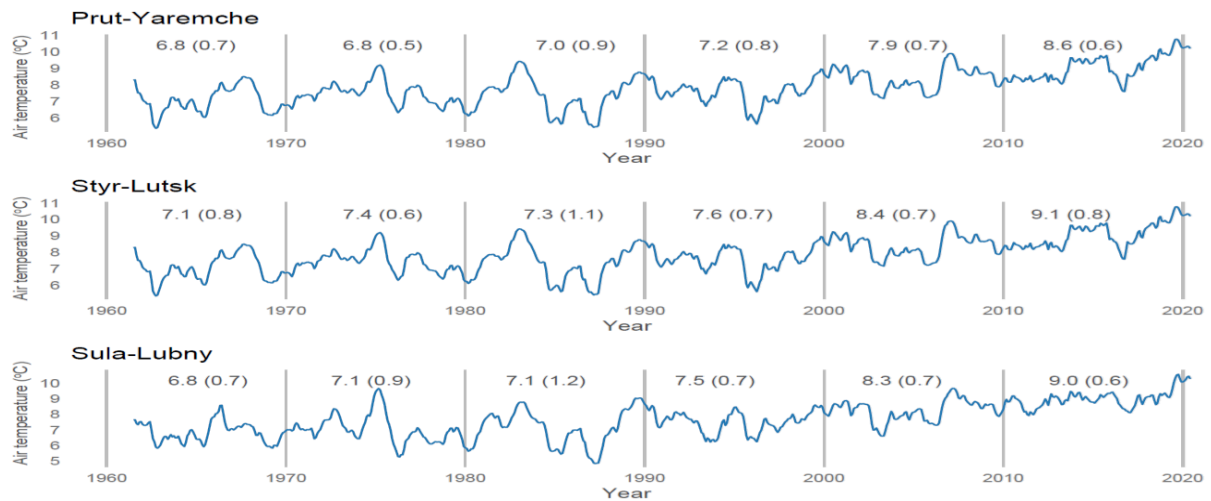

Figure S9. Air temperatur trend values grouped by rivers (1961-2020).

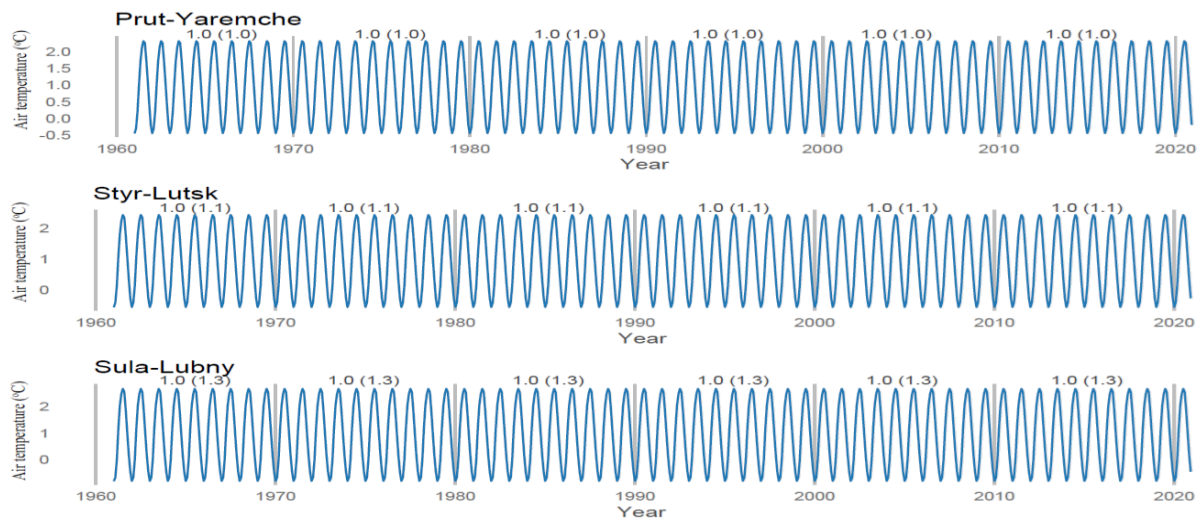

Figure S10. Air temperatur seasonal values grouped by rivers (1961-2020).

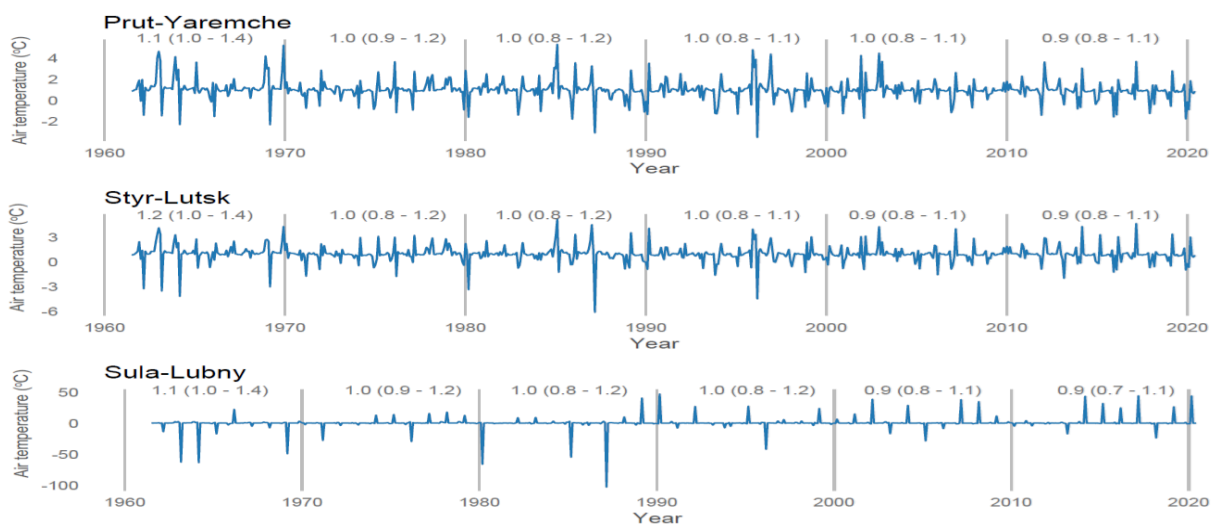

Figure S11. Air temperatur and random values grouped by rivers (1961-2020).

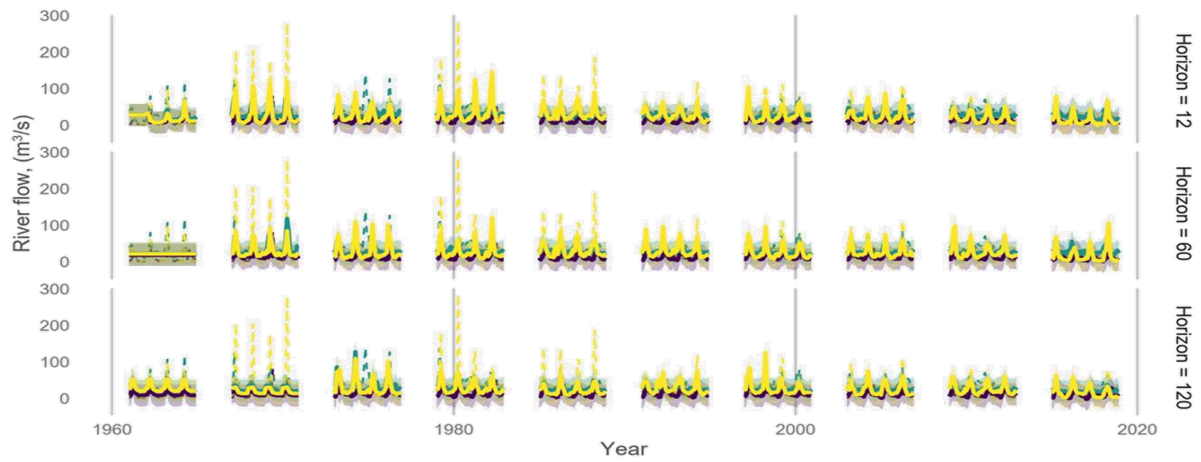

**Figure S12.** River flows predicted (solid line) vs. actual (dashed line) values grouped by horizons (purple line: the Prut River-Yaremche, turquoise line: the Styr River-Luts'k, yellow line: the Sula River-Lubny).

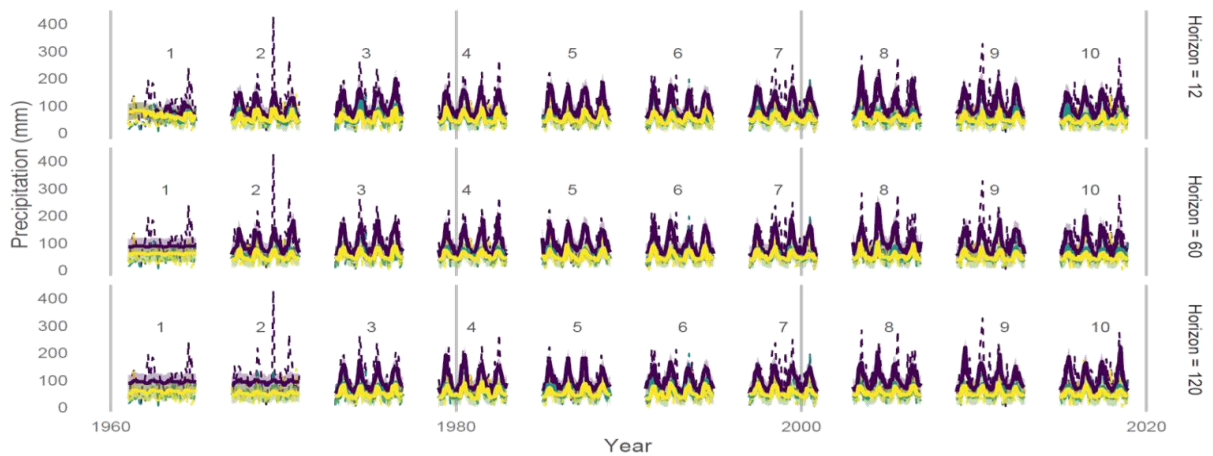

**Figure S13.** Precipitation predicted (solid) vs. actual (dashed) values grouped by horizons (purple line: Prut River catchment. turquoise line: Styr River catchment. yellow line: Sula River catchment).

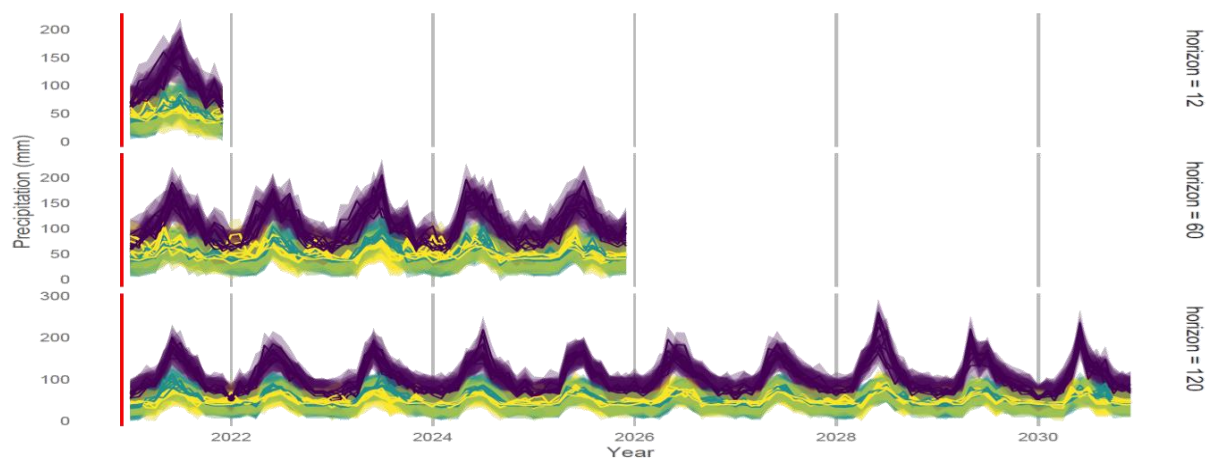

**Figure S14.** 12, 60 and 120 step-ahead forecasts of precipitation (purple line: the Prut River catchment, turquoise. line: the Styr River catchment, yellow line: the Sula River catchment).

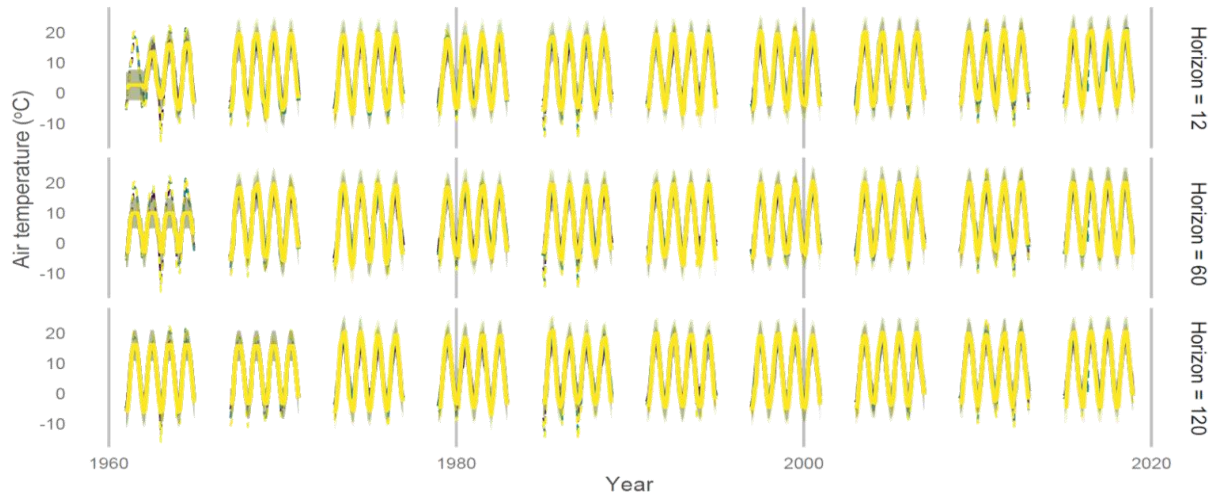

**Figure S15.** Air temperature predicted (solid) vs. actual (dashed) values grouped by horizons (purple line: PrutRiver catchment. turquoise line: Styr River catchment. yellow line: Sula River catchment).

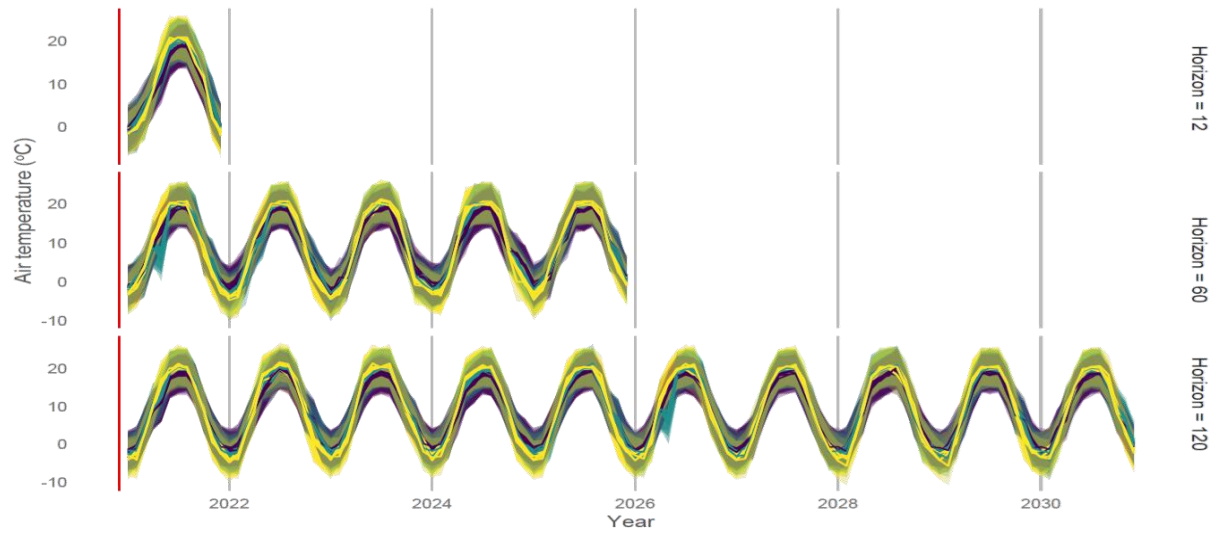

**Figure S16.** 12, 60 and 120 step-ahead forecasts of air temperature (purple line: the Prut River catchment, turquoise line: the Styr River catchment, yellow line: the Sula river catchment).

**Table S1.** Forecast error by river flow forecast horizon.

| Horizon<br>(months) | River         | MAE   | MAPE  | MDAPE | SMAPE | RMSE  | NRMSE |
|---------------------|---------------|-------|-------|-------|-------|-------|-------|
| 12                  | Prut-Yaremche | 6.48  | 78.09 | 46.99 | 51.23 | 8.42  | 0.80  |
| 12                  | Styr-Lutsk    | 11.23 | 32.35 | 26.23 | 32.59 | 14.47 | 0.81  |
| 12                  | Sula-Lubny    | 12.35 | 72.35 | 43.46 | 50.07 | 16.72 | 0.51  |
| 60                  | Prut-Yaremche | 6.21  | 73.63 | 47.80 | 50.19 | 7.93  | 0.75  |
| 60                  | Styr-Lutsk    | 11.34 | 35.42 | 26.58 | 34.05 | 15.57 | 0.87  |
| 60                  | Sula-Lubny    | 15.07 | 84.49 | 46.62 | 55.71 | 21.31 | 0.66  |
| 120                 | Prut-Yaremche | 6.28  | 76.42 | 47.12 | 52.39 | 8.50  | 0.81  |
| 120                 | Styr-Lutsk    | 11.35 | 33.49 | 26.95 | 32.44 | 15.82 | 0.89  |
| 120                 | Sula-Lubny    | 15.50 | 82.42 | 50.34 | 58.54 | 20.53 | 0.63  |

Explanations of the measures are provided in the Methods section.

**Table S2.** Global river flow forecast error.

| River         | MAE   | MAPE  | MDAPE | SMAPE | RMSE  | NRMSE |
|---------------|-------|-------|-------|-------|-------|-------|
| Prut-Yaremche | 6.35  | 75.88 | 47.30 | 51.27 | 8.18  | 0.78  |
| Styr-Lutsk    | 11.30 | 32.87 | 26.45 | 32.82 | 14.57 | 0.82  |
| Sula-Lubny    | 14.31 | 79.63 | 44.62 | 55.71 | 19.87 | 0.61  |

Explanations of the measures are provided in the Methods section.

**Table S3.** Forecast error by precipitation forecast horizon and river catchment.

| Horizon<br>(months) | River<br>catchment | MAE   | MAPE  | MDAPE | SMAPE | RMSE  | NRMSE |
|---------------------|--------------------|-------|-------|-------|-------|-------|-------|
| 12                  | Prut               | 37.74 | 54.50 | 33.15 | 39.18 | 47.85 | 0.79  |
| 12                  | Styr               | 21.57 | 69.90 | 36.24 | 42.35 | 28.16 | 0.85  |
| 12                  | Sula               | 23.84 | 95.95 | 40.06 | 48.22 | 29.92 | 0.97  |
| 60                  | Prut               | 36.69 | 56.66 | 31.74 | 39.44 | 48.51 | 0.80  |
| 60                  | Styr               | 22.62 | 71.30 | 37.76 | 44.25 | 28.84 | 0.87  |
| 60                  | Sula               | 24.63 | 92.79 | 37.55 | 48.76 | 29.99 | 0.98  |
| 120                 | Prut               | 36.33 | 61.00 | 32.16 | 39.33 | 46.02 | 0.76  |
| 120                 | Styr               | 21.49 | 70.07 | 34.85 | 42.35 | 27.62 | 0.83  |
| 120                 | Sula               | 23.96 | 88.16 | 39.28 | 49.43 | 28.82 | 0.94  |

Explanations of the measures are provided in the Methods section.

**Table S4.** Global precipitation forecast error grouped by river catchment.

| River<br>catchment | MAE   | MAPE  | MDAPE | SMAPE | RMSE  | NRMSE |
|--------------------|-------|-------|-------|-------|-------|-------|
| Prut               | 37.01 | 57.00 | 32.16 | 39.33 | 47.55 | 0.79  |
| Styr               | 22.07 | 70.14 | 36.24 | 42.92 | 28.36 | 0.86  |
| Sula               | 24.15 | 88.16 | 38.48 | 48.48 | 29.45 | 0.96  |

Explanations of the measures are provided in the Methods section.

**Table S5.** Forecast error by air temperature forecast horizon and river catchment.

| Horizon<br>(months) | River<br>catchment | MAE  | MAPE  | MDAPE | SMAPE | RMSE | NRMSE |
|---------------------|--------------------|------|-------|-------|-------|------|-------|
| 12                  | Prut               | 1.64 | 86.96 | 18.80 | 49.43 | 2.14 | 0.28  |
| 12                  | Styr               | 1.81 | 60.77 | 16.26 | 47.54 | 2.39 | 0.28  |
| 12                  | Sula               | 1.87 | 78.85 | 19.06 | 47.51 | 2.45 | 0.29  |
| 60                  | Prut               | 1.73 | 94.26 | 19.23 | 50.21 | 2.22 | 0.30  |
| 60                  | Styr               | 1.86 | 56.90 | 18.64 | 49.44 | 2.36 | 0.28  |
| 60                  | Sula               | 2.02 | 84.05 | 17.75 | 43.76 | 2.61 | 0.31  |
| 120                 | Prut               | 1.70 | 68.20 | 16.28 | 48.27 | 2.18 | 0.29  |
| 120                 | Styr               | 1.87 | 57.07 | 17.56 | 46.41 | 2.40 | 0.28  |
| 120                 | Sula               | 2.07 | 81.56 | 20.08 | 46.07 | 2.61 | 0.31  |

Explanations of the measures are provided in the Methods section.

**Table S6.** Global air temperature forecast error grouped by river catchment.

| <b>River<br/>catchment</b> | <b>MAE</b> | <b>MAPE</b> | <b>MDAPE</b> | <b>SMAPE</b> | <b>RMSE</b> | <b>NRMSE</b> |
|----------------------------|------------|-------------|--------------|--------------|-------------|--------------|
| Prut                       | 1.70       | 86.96       | 18.24        | 49.08        | 2.19        | 0.29         |
| Styr                       | 1.85       | 57.07       | 17.56        | 48.20        | 2.38        | 0.28         |
| Sula                       | 1.94       | 81.56       | 19.13        | 45.70        | 2.55        | 0.30         |

Explanations of the measures are provided in the Methods section.
